# Supplementary material for: Identification of an exosome-related signature associated with prognosis and immune infiltration in breast cancer
Source: PubMed Central journal article supplement (PMC10598067; doi:10.1038/s41598-023-45325-7), 2023-10-24
Supplement: 41598_2023_45325_MOESM1_ESM.pdf [file 41598_2023_45325_MOESM1_ESM.pdf]

The information of 121 exosome-related genes

| id       | Gene Type | Gene Source | Cell Source            | Catogrey                             | Ensemble        | Chromosome/scaffold name | Gene start (bp) | Gene end (bp) | Strand    | Gene description                                                                                        |
|----------|-----------|-------------|------------------------|--------------------------------------|-----------------|--------------------------|-----------------|---------------|-----------|---------------------------------------------------------------------------------------------------------|
| CDC42    | mRNA      | pubmed      | 4T1                    | Biological interesting molecule      | ENSG00000070831 |                          | 1               | 22052627      | 22092946  | 1 cell division cycle 42 [Source:HGNC Symbol;Acc:HGNC:1736]                                             |
| CP       | mRNA      | pubmed      | 4T1                    | Biological interesting molecule      | ENSG00000047457 |                          | 3               | 149162410     | 149222055 | -1 ceruloplasmin [Source:HGNC Symbol;Acc:HGNC:2295]                                                     |
| CD47     | mRNA      | pubmed      | MDA-MB-231, MCF-12A    | Potential biomarker                  | ENSG00000196776 |                          | 3               | 108043094     | 108091862 | -1 CD47 molecule [Source:HGNC Symbol;Acc:HGNC:1682]                                                     |
| EEF1A1   | mRNA      | pubmed      | MDA-MB-436, MDA-MB-231 | Biological interesting molecule      | ENSG00000156508 |                          | 6               | 73515750      | 73523797  | -1 eukaryotic translation elongation factor 1 alpha 1 [Source:HGNC Symbol;Acc:HGNC:3189]                |
| EPCAM    | mRNA      | pubmed      | BT474                  | Biological interesting molecule      | ENSG00000119888 |                          | 2               | 47345158      | 47387601  | 1 epithelial cell adhesion molecule [Source:HGNC Symbol;Acc:HGNC:11529]                                 |
| ERBB2    | mRNA      | pubmed      | BT474                  | Biological interesting molecule      | ENSG00000141736 |                          | 17              | 39687914      | 39730426  | 1 erb-b2 receptor tyrosine kinase 2 [Source:HGNC Symbol;Acc:HGNC:3430]                                  |
| FGFR2    | mRNA      | pubmed      | 4T1                    | Biological interesting molecule      | ENSG00000066468 |                          | 10              | 121478334     | 121598458 | -1 fibroblast growth factor receptor 2 [Source:HGNC Symbol;Acc:HGNC:3689]                               |
| CHEK2    | mRNA      | GSE93070    |                        | 1833 Potential biomarker             | ENSG00000183765 |                          | 22              | 28687743      | 28742422  | -1 checkpoint kinase 2 [Source:HGNC Symbol;Acc:HGNC:16627]                                              |
| BAR1     | mRNA      | GSE93070    |                        | 1833 Biological interesting molecule | ENSG00000138376 |                          | 2               | 214725646     | 214809711 | -1 BRCA1 associated RING domain 1 [Source:HGNC Symbol;Acc:HGNC:952]                                     |
| TSC2     | mRNA      | GSE93070    |                        | 1833 Biological interesting molecule | ENSG00000103197 |                          | 16              | 2047465       | 2089487   | 1 TSC complex subunit 2 [Source:HGNC Symbol;Acc:HGNC:12363]                                             |
| CASP7    | mRNA      | GSE93070    |                        | 1833 Biological interesting molecule | ENSG00000165806 |                          | 10              | 113679162     | 113730907 | 1 caspase 7 [Source:HGNC Symbol;Acc:HGNC:1508]                                                          |
| SFN      | mRNA      | GSE93070    |                        | 1833 Potential biomarker             | ENSG00000175793 |                          | 1               | 26863138      | 26864457  | 1 stratifin [Source:HGNC Symbol;Acc:HGNC:10773]                                                         |
| TYR      | mRNA      | GSE93070    |                        | 1833 Biological interesting molecule | ENSG00000077498 |                          | 11              | 89177452      | 89295759  | 1 tyrosinase [Source:HGNC Symbol;Acc:HGNC:14422]                                                        |
| CCKBR    | mRNA      | GSE93070    |                        | 1833 Biological interesting molecule | ENSG00000110148 |                          | 11              | 6259736       | 6272127   | 1 cholecystokinin B receptor [Source:HGNC Symbol;Acc:HGNC:1571]                                         |
| CYP11A1  | mRNA      | GSE93070    |                        | 1833 Biological interesting molecule | ENSG00000140459 |                          | 15              | 74337759      | 74367740  | -1 cytochrome P450 family 11 subfamily A member 1 [Source:HGNC Symbol;Acc:HGNC:2590]                    |
| GATA4    | mRNA      | GSE93070    |                        | 1833 Potential biomarker             | ENSG00000136574 |                          | 8               | 11676959      | 11760002  | 1 GATA binding protein 4 [Source:HGNC Symbol;Acc:HGNC:4173]                                             |
| ABC11    | mRNA      | GSE93070    |                        | 1833 Biological interesting molecule | ENSG00000073734 |                          | 2               | 168922938     | 169031322 | -1 ATP binding cassette subfamily B member 11 [Source:HGNC Symbol;Acc:HGNC:42]                          |
| IVL      | mRNA      | GSE93070    |                        | 1833 Potential biomarker             | ENSG00000163207 |                          | 1               | 152908545     | 152911886 | 1 involucrin [Source:HGNC Symbol;Acc:HGNC:6187]                                                         |
| BID      | mRNA      | GSE93070    |                        | 1833 Biological interesting molecule | ENSG00000154755 |                          | 22              | 17734138      | 17747770  | -1 BH3 interacting domain death agonist [Source:HGNC Symbol;Acc:HGNC:1050]                              |
| SDHA     | mRNA      | GSE93070    |                        | 1833 Biological interesting molecule | ENSG00000073578 |                          | 5               | 218241        | 257082    | 1 succinate dehydrogenase complex flavoprotein subunit A [Source:HGNC Symbol;Acc:HGNC:10680]            |
| USF1     | mRNA      | GSE93070    |                        | 1833 Biological interesting molecule | ENSG00000158773 |                          | 1               | 161039251     | 161045977 | -1 upstream transcription factor 1 [Source:HGNC Symbol;Acc:HGNC:12593]                                  |
| RHO      | mRNA      | GSE93070    |                        | 1833 Biological interesting molecule | ENSG00000163914 |                          | 3               | 129528640     | 129535169 | 1 rhodopsin [Source:HGNC Symbol;Acc:HGNC:10012]                                                         |
| TAC1     | mRNA      | GSE93070    |                        | 1833 Potential biomarker             | ENSG00000006128 |                          | 7               | 97731908      | 97740472  | 1 tachykinin precursor 1 [Source:HGNC Symbol;Acc:HGNC:11517]                                            |
| HLA-DQA1 | mRNA      | GSE93070    |                        | 1833 Biological interesting molecule | ENSG00000196735 |                          | 6               | 32628179      | 32647062  | 1 major histocompatibility complex, class II, DQ alpha 1 [Source:HGNC Symbol;Acc:HGNC:4942]             |
| RIPK1    | mRNA      | GSE93070    |                        | 1833 Biological interesting molecule | ENSG00000137275 |                          | 6               | 3063991       | 3115187   | 1 receptor interacting serine/threonine kinase 1 [Source:HGNC Symbol;Acc:HGNC:10019]                    |
| CUL4A    | mRNA      | GSE93070    |                        | 1833 Biological interesting molecule | ENSG00000139842 |                          | 13              | 113208193     | 113267108 | 1 cullin 4A [Source:HGNC Symbol;Acc:HGNC:2554]                                                          |
| ABC5     | mRNA      | GSE93070    |                        | 1833 Biological interesting molecule | ENSG00000004846 |                          | 7               | 20615207      | 20777038  | 1 ATP binding cassette subfamily B member 5 [Source:HGNC Symbol;Acc:HGNC:46]                            |
| ADCYAP1  | mRNA      | GSE93070    |                        | 1833 Biological interesting molecule | ENSG00000141433 |                          | 18              | 904943        | 912172    | 1 adenylate cyclase activating polypeptide 1 [Source:HGNC Symbol;Acc:HGNC:241]                          |
| FZD5     | mRNA      | GSE93070    |                        | 1833 Biological interesting molecule | ENSG00000163251 |                          | 2               | 207762586     | 207769563 | -1 frizzled class receptor 5 [Source:HGNC Symbol;Acc:HGNC:4043]                                         |
| RANBP1   | mRNA      | GSE93070    |                        | 1833 Biological interesting molecule | ENSG00000099901 |                          | 22              | 20115938      | 20127357  | 1 RAN binding protein 1 [Source:HGNC Symbol;Acc:HGNC:9847]                                              |
| CASC3    | mRNA      | GSE93070    |                        | 1833 Biological interesting molecule | ENSG00000108349 |                          | 17              | 40140318      | 40172171  | 1 CASC3 exon junction complex subunit [Source:HGNC Symbol;Acc:HGNC:17040]                               |
| GPBAR1   | mRNA      | GSE93070    |                        | 1833 Biological interesting molecule | ENSG00000179921 |                          | 2               | 218259496     | 218263859 | 1 G protein-coupled bile acid receptor 1 [Source:HGNC Symbol;Acc:HGNC:19680]                            |
| PSMC5    | mRNA      | GSE93070    |                        | 1833 Biological interesting molecule | ENSG00000087191 |                          | 17              | 63827152      | 63832026  | 1 proteasome 26S subunit, ATPase 5 [Source:HGNC Symbol;Acc:HGNC:9552]                                   |
| POLR2K   | mRNA      | GSE93070    |                        | 1833 Biological interesting molecule | ENSG00000147669 |                          | 8               | 100150584     | 100154002 | 1 RNA polymerase II subunit K [Source:HGNC Symbol;Acc:HGNC:9198]                                        |
| PLCB4    | mRNA      | GSE93070    |                        | 1833 Biological interesting molecule | ENSG00000101333 |                          | 20              | 9068763       | 9481242   | 1 phospholipase C beta 4 [Source:HGNC Symbol;Acc:HGNC:9059]                                             |
| DOK1     | mRNA      | GSE93070    |                        | 1833 Biological interesting molecule | ENSG00000115325 |                          | 2               | 74549026      | 74557554  | 1 docking protein 1 [Source:HGNC Symbol;Acc:HGNC:2990]                                                  |
| SF3B4    | mRNA      | GSE93070    |                        | 1833 Biological interesting molecule | ENSG00000143368 |                          | 1               | 149923317     | 149928344 | -1 splicing factor 3b subunit 4 [Source:HGNC Symbol;Acc:HGNC:10771]                                     |
| GTF2I    | mRNA      | GSE93070    |                        | 1833 Potential biomarker             | ENSG00000263001 |                          | 7               | 74657667      | 74760692  | 1 general transcription factor Iii [Source:HGNC Symbol;Acc:HGNC:4659]                                   |
| NOC2L    | mRNA      | GSE93070    |                        | 1833 Biological interesting molecule | ENSG00000188976 |                          | 1               | 944204        | 959309    | -1 NOC2 like nucleolar associated transcriptional repressor [Source:HGNC Symbol;Acc:HGNC:24517]         |
| MEF2A    | mRNA      | GSE93070    |                        | 1833 Biological interesting molecule | ENSG00000068305 |                          | 15              | 99565417      | 99716466  | 1 myocyte enhancer factor 2A [Source:HGNC Symbol;Acc:HGNC:6993]                                         |
| CYC1     | mRNA      | GSE93070    |                        | 1833 Potential biomarker             | ENSG00000179091 |                          | 8               | 144095027     | 144097525 | 1 cytochrome c1 [Source:HGNC Symbol;Acc:HGNC:2579]                                                      |
| MRPL21   | mRNA      | GSE93070    |                        | 1833 Biological interesting molecule | ENSG00000197345 |                          | 11              | 68891276      | 68903835  | -1 mitochondrial ribosomal protein L21 [Source:HGNC Symbol;Acc:HGNC:14479]                              |
| MRPL4    | mRNA      | GSE93070    |                        | 1833 Biological interesting molecule | ENSG00000105364 |                          | 19              | 10251901      | 10260045  | 1 mitochondrial ribosomal protein L4 [Source:HGNC Symbol;Acc:HGNC:14276]                                |
| BDKR2    | mRNA      | GSE93070    |                        | 1833 Biological interesting molecule | ENSG00000168398 |                          | 14              | 96204679      | 96244166  | 1 bradykinin receptor B2 [Source:HGNC Symbol;Acc:HGNC:1030]                                             |
| PIK3R5   | mRNA      | GSE93070    |                        | 1833 Biological interesting molecule | ENSG00000141506 |                          | 17              | 8878911       | 8965712   | -1 phosphoinositide-3-kinase regulatory subunit 5 [Source:HGNC Symbol;Acc:HGNC:30035]                   |
| PRPF3    | mRNA      | GSE93070    |                        | 1833 Biological interesting molecule | ENSG00000117360 |                          | 1               | 150321476     | 150353195 | 1 pre-mRNA processing factor 3 [Source:HGNC Symbol;Acc:HGNC:17348]                                      |
| PSMD2    | mRNA      | GSE93070    |                        | 1833 Potential biomarker             | ENSG00000175166 |                          | 3               | 184298709     | 184309054 | 1 proteasome 26S subunit, non-ATPase 2 [Source:HGNC Symbol;Acc:HGNC:9559]                               |
| SNRPA1   | mRNA      | GSE93070    |                        | 1833 Biological interesting molecule | ENSG00000131876 |                          | 15              | 101281510     | 101295282 | -1 small nuclear ribonucleoprotein polypeptide A' [Source:HGNC Symbol;Acc:HGNC:11152]                   |
| RPS10    | mRNA      | GSE93070    |                        | 1833 Biological interesting molecule | ENSG00000124614 |                          | 6               | 34417454      | 34426125  | -1 ribosomal protein S10 [Source:HGNC Symbol;Acc:HGNC:10383]                                            |
| ADRA1B   | mRNA      | GSE93070    |                        | 1833 Biological interesting molecule | ENSG00000170214 |                          | 5               | 159865080     | 159972544 | 1 adrenoceptor alpha 1B [Source:HGNC Symbol;Acc:HGNC:278]                                               |
| TRIOBP   | mRNA      | GSE93070    |                        | 1833 Biological interesting molecule | ENSG00000100106 |                          | 22              | 37696988      | 37776556  | 1 TRIO and F-actin binding protein [Source:HGNC Symbol;Acc:HGNC:17009]                                  |
| RPL26L1  | mRNA      | GSE93070    |                        | 1833 Biological interesting molecule | ENSG00000037241 |                          | 5               | 172958729     | 172969771 | 1 ribosomal protein L26 like 1 [Source:HGNC Symbol;Acc:HGNC:17050]                                      |
| FAM162A  | mRNA      | GSE93070    |                        | 1833 Biological interesting molecule | ENSG00000114023 |                          | 3               | 122384176     | 122412334 | 1 family with sequence similarity 162 member A [Source:HGNC Symbol;Acc:HGNC:17865]                      |
| SF3A2    | mRNA      | GSE93070    |                        | 1833 Biological interesting molecule | ENSG00000104897 |                          | 19              | 2236504       | 2248679   | 1 splicing factor 3a subunit 2 [Source:HGNC Symbol;Acc:HGNC:10766]                                      |
| HER2     | mRNA      | pubmed      | MCF7, MDA-MB-231       | Potential biomarker                  | ENSG00000141736 |                          | 17              | 39687914      | 39730426  | 1 erb-b2 receptor tyrosine kinase 2 [Source:HGNC Symbol;Acc:HGNC:3430]                                  |
| CDS2     | mRNA      | pubmed      |                        | Potential biomarker                  | ENSG00000085117 |                          | 11              | 44564427      | 44620358  | 1 CDS2 molecule [Source:HGNC Symbol;Acc:HGNC:6210]                                                      |
| CD24     | mRNA      | pubmed      |                        | Potential biomarker                  | ENSG00000272398 |                          | 6               | 106969831     | 106975627 | -1 CD24 molecule [Source:HGNC Symbol;Acc:HGNC:1645]                                                     |
| De1-1    | mRNA      | pubmed      |                        | Potential biomarker                  | ENSG00000164176 |                          | 5               | 83940554      | 84384793  | -1 EGF like repeats and discoidin domains 3 [Source:HGNC Symbol;Acc:HGNC:3173]                          |
| Dicer    | mRNA      | pubmed      | MCF7, 4T1, MDA-MB-231  | Biological interesting molecule      | ENSG00000100697 |                          | 14              | 95086228      | 95158010  | -1 dicer 1, ribonuclease III [Source:HGNC Symbol;Acc:HGNC:17098]                                        |
| POSTN    | mRNA      | pubmed      | MCF7, MDA-MB-231       | Potential biomarker                  | ENSG00000133110 |                          | 13              | 37562583      | 37598844  | -1 periostin [Source:HGNC Symbol;Acc:HGNC:16953]                                                        |
| GFGR3    | mRNA      | pubmed      | 4T1                    | Biological interesting molecule      | ENSG00000068078 |                          | 4               | 1793293       | 1808872   | 1 fibroblast growth factor receptor 3 [Source:HGNC Symbol;Acc:HGNC:3690]                                |
| FIBP     | mRNA      | pubmed      | 4T1                    | Biological interesting molecule      | ENSG00000172500 |                          | 11              | 65883741      | 65888539  | -1 FGF1 intracellular binding protein [Source:HGNC Symbol;Acc:HGNC:3705]                                |
| FRS2     | mRNA      | pubmed      | 4T1                    | Biological interesting molecule      | ENSG00000166225 |                          | 12              | 69470349      | 69579789  | 1 fibroblast growth factor receptor substrate 2 [Source:HGNC Symbol;Acc:HGNC:16971]                     |
| FTH1     | mRNA      | pubmed      | MDA-MB-436, MDA-MB-231 | Biological interesting molecule      | ENSG00000167996 |                          | 11              | 61959718      | 61967660  | -1 ferritin heavy chain 1 [Source:HGNC Symbol;Acc:HGNC:3976]                                            |
| FTL      | mRNA      | pubmed      | MDA-MB-436, MDA-MB-231 | Biological interesting molecule      | ENSG00000087086 |                          | 19              | 48965301      | 48966878  | 1 ferritin light chain [Source:HGNC Symbol;Acc:HGNC:3999]                                               |
| GSTP1    | mRNA      | pubmed      | MCF7                   | Biological interesting molecule      | ENSG00000084207 |                          | 11              | 67583595      | 67586656  | 1 glutathione S-transferase pi 1 [Source:HGNC Symbol;Acc:HGNC:4638]                                     |
| HOXC6    | mRNA      | pubmed      | MDA-MB-231, T47D       | Biological interesting molecule      | ENSG00000197757 |                          | 12              | 53990624      | 54030823  | 1 homeobox C6 [Source:HGNC Symbol;Acc:HGNC:5128]                                                        |
| HTR7     | mRNA      | pubmed      | MDA-MB-231, T47D       | Biological interesting molecule      | ENSG00000148680 |                          | 10              | 90740823      | 90857698  | -1 5-hydroxytryptamine receptor 7 [Source:HGNC Symbol;Acc:HGNC:5302]                                    |
| IGF1R    | mRNA      | pubmed      | 4T1                    | Biological interesting molecule      | ENSG00000140443 |                          | 15              | 98648971      | 98964530  | 1 insulin like growth factor 1 receptor [Source:HGNC Symbol;Acc:HGNC:5465]                              |
| IL1RAP   | mRNA      | pubmed      | 4T1                    | Biological interesting molecule      | ENSG00000196083 |                          | 3               | 190514051     | 190659750 | 1 interleukin 1 receptor accessory protein [Source:HGNC Symbol;Acc:HGNC:5995]                           |
| ITGB1    | mRNA      | pubmed      | 4T1                    | Biological interesting molecule      | ENSG00000150093 |                          | 10              | 32900319      | 33005792  | -1 integrin subunit beta 1 [Source:HGNC Symbol;Acc:HGNC:6153]                                           |
| KISS1R   | mRNA      | pubmed      | MDA-MB-231, T47D       | Biological interesting molecule      | ENSG00000116014 |                          | 19              | 917287        | 921015    | 1 KISS1 receptor [Source:HGNC Symbol;Acc:HGNC:4510]                                                     |
| KRT14    | mRNA      | pubmed      | 4T1                    | Biological interesting molecule      | ENSG00000186847 |                          | 17              | 41582279      | 41586921  | -1 keratin 14 [Source:HGNC Symbol;Acc:HGNC:6416]                                                        |
| LDHA     | mRNA      | pubmed      | 4T1                    | Biological interesting molecule      | ENSG00000134333 |                          | 11              | 18394388      | 18408425  | 1 lactate dehydrogenase A [Source:HGNC Symbol;Acc:HGNC:6535]                                            |
| MDH      | mRNA      | pubmed      | 4T1                    | Biological interesting molecule      | ENSG00000147649 |                          | 8               | 97644179      | 97728770  | 1 metadherin [Source:HGNC Symbol;Acc:HGNC:29608]                                                        |
| NANOG    | mRNA      | pubmed      | MDA-MB-231, T47D       | Biological interesting molecule      | ENSG00000111704 |                          | 12              | 7787794       | 7799141   | 1 Nanog homeobox [Source:HGNC Symbol;Acc:HGNC:20857]                                                    |
| NEUROD1  | mRNA      | pubmed      | MDA-MB-231, T47D       | Biological interesting molecule      | ENSG00000162992 |                          | 2               | 181673088     | 181680876 | -1 neuronal differentiation 1 [Source:HGNC Symbol;Acc:HGNC:7762]                                        |
| Plau     | mRNA      | pubmed      | 4T1                    | Biological interesting molecule      | ENSG00000122861 |                          | 10              | 73909177      | 73917497  | 1 plasminogen activator, urokinase [Source:HGNC Symbol;Acc:HGNC:9052]                                   |
| RAB13    | mRNA      | pubmed      | MDA-MB-436, MDA-MB-231 | Biological interesting molecule      | ENSG00000143545 |                          | 1               | 153981617     | 153986358 | -1 RAB13, member RAS oncogene family [Source:HGNC Symbol;Acc:HGNC:9762]                                 |
| RPL28    | mRNA      | pubmed      | MDA-MB-436, MDA-MB-231 | Biological interesting molecule      | ENSG00000108107 |                          | 19              | 55385345      | 55403250  | 1 ribosomal protein L28 [Source:HGNC Symbol;Acc:HGNC:10330]                                             |
| S1PR2    | mRNA      | pubmed      | MDA-MB-231             | Biological interesting molecule      | ENSG00000267534 |                          | 19              | 10221433      | 10231331  | -1 sphingosine-1-phosphate receptor 2 [Source:HGNC Symbol;Acc:HGNC:3169]                                |
| TGFR1    | mRNA      | pubmed      | 4T1                    | Biological interesting molecule      | ENSG00000106799 |                          | 9               | 99104038      | 99154192  | 1 transforming growth factor beta receptor 1 [Source:HGNC Symbol;Acc:HGNC:11772]                        |
| TRPC5    | mRNA      | pubmed      |                        | Potential biomarker                  | ENSG00000072315 | X                        |                 | 111774315     | 112082776 | -1 transient receptor potential cation channel subfamily C member 5 [Source:HGNC Symbol;Acc:HGNC:12594] |
| TSG101   | mRNA      | pubmed      | BT474                  | Biological interesting molecule      | ENSG00000074319 |                          | 11              | 18468336      | 18527232  | -1 tumor susceptibility 101 [Source:HGNC Symbol;Acc:HGNC:15971]                                         |
| UCLH1    | mRNA      | pubmed      | MCF7                   | Biological interesting molecule      | ENSG00000154277 |                          | 4               | 41256413      | 41268455  | 1 ubiquitin C-terminal hydrolase L1 [Source:HGNC Symbol;Acc:HGNC:12513]                                 |
| ADAM10   | mRNA      | pubmed      |                        | Biological interesting molecule      | ENSG00000137845 |                          | 15              | 58588809      | 58749791  | -1 ADAM metalloproteinase domain 10 [Source:HGNC Symbol;Acc:HGNC:188]                                   |
| CYP19A1  | mRNA      | GSE93070    |                        | 1833 Biological interesting molecule | ENSG00000137869 |                          | 15              | 51208057      | 51338610  | -1 cytochrome P450 family 19 subfamily A member 1 [Source:HGNC Symbol;Acc:HGNC:2594]                    |
| CTSB     | mRNA      | GSE93070    |                        | 1833 Biological interesting molecule | ENSG00000164733 |                          | 8               | 11842524      | 11869448  | -1 cathepsin B [Source:HGNC Symbol;Acc:HGNC:2527]                                                       |
| ELK1     | mRNA      | GSE93070    |                        | 1833 Biological interesting molecule | ENSG00000126767 | X                        |                 | 47635521      | 47650604  | -1 ELK1, ETS transcription factor [Source:HGNC Symbol;Acc:HGNC:3321]                                    |
| PIGR     | mRNA      | GSE93070    |                        | 1833 Biological interesting molecule | ENSG00000162896 |                          | 1               | 206928518     | 206946466 | -1 polymeric immunoglobulin receptor [Source:HGNC Symbol;Acc:HGNC:8968]                                 |
| FGF9     | mRNA      | GSE93070    |                        | 1833 Biological interesting molecule | ENSG00000102678 |                          | 13              | 21671383      | 21704498  | 1 fibroblast growth factor 9 [Source:HGNC Symbol;Acc:HGNC:3687]                                         |
| DUSP1    | mRNA      | GSE93070    |                        | 1833 Biological interesting molecule | ENSG00000120129 |                          | 5               | 172768090     | 172771195 | -1 dual specificity phosphatase 1 [Source:HGNC Symbol;Acc:HGNC:3064]                                    |
| MRPS30   | mRNA      | GSE93070    |                        | 1833 Biological interesting molecule | ENSG00000112996 |                          | 5               | 44808925      | 44820428  | 1 mitochondrial ribosomal protein S30 [Source:HGNC Symbol;Acc:HGNC:8769]                                |
| DMRT1    | mRNA      |             |                        |                                      |                 |                          |                 |               |           |                                                                                                         |
