# Supplementary material for: Identification of an exosome-related signature associated with prognosis and immune infiltration in breast cancer
Source: PubMed Central journal article supplement (PMC10598067; doi:10.1038/s41598-023-45325-7), 2023-10-24
Supplement: 41598_2023_45325_MOESM2_ESM.pdf [file 41598_2023_45325_MOESM2_ESM.pdf]

### The primers

|                | <b>FORWARD</b>                  | <b>REVERSE</b>                  |
|----------------|---------------------------------|---------------------------------|
| <b>EPCAM</b>   | 5'-TTGCCGCAGCTCAGGAAGAATG-3'    | 5'-CGCTCTCATCGCAGTCAGGATC-3'    |
| <b>PIGR</b>    | 5'-CATCCCTCCCTCCCCTCCTTC-3'     | 5'-TGTGAGCAGTGTTGGTGGCATAAC-3'  |
| <b>KRT14</b>   | 5'-TCATCCAGAGATGTGACCTCC-3'     | 5'-GCCTCAGTTCTTGGTGCGAA-3'      |
| <b>DOK7</b>    | 5'-AGTGGAAGAGTAGGTGGCTGGTG-3'   | 5'-GATACGCTCCGACTTGCCTTGTAG-3'  |
| <b>CD24</b>    | 5'-GCTCCTACCCACGCAGATTTATTCC-3' | 5'-CACGAAGAGACTGGCTGTTGACTG-3'  |
| <b>CYP19A1</b> | 5'-TCCATCCTTGCCAATAGTGTCATCC-3' | 5'-CTTGTAGCCTGGTTCTCTGGTGTG-3'  |
| <b>CXCL13</b>  | 5'-CTCTGCTTCTCATGCTGCTGGTC-3'   | 5'-GCTCTCTTGGACACATCTACACCTC-3' |
| <b>β-ACTIN</b> | 5'-CATGTACGTTGCTATCCAGGC-3'     | 5'-CTCCTTAATGTCACGCACGAT-3'     |
